# Supplementary material
Source: HighWire-hosted journal article supplement (https://bmjopen.bmj.com/content/7/8/e015001)
Supplement: inline-supplementary-material-1 [file inline-supplementary-material-1.pdf]

## SUPPLEMENTARY MATERIAL

### LONGITUDINAL AND SECULAR TRENDS IN TOTAL CHOLESTEROL LEVELS AND LIPID-LOWERING DRUG USE AMONG NORWEGIAN WOMEN AND MEN BORN 1905-1977 IN THE POPULATION-BASED TROMSØ STUDY 1979-2016

Laila Arnesdatter Hopstock<sup>1,2</sup>, Kaare Harald Bønnaa<sup>1,3,4</sup>, Anne Elise Eggen<sup>1</sup>, Sameline Grimsgaard<sup>1</sup>, Bjarne K. Jacobsen<sup>1</sup>, Maja-Lisa Løchen<sup>1,5</sup>, Ellisiv B. Mathiesen<sup>6,7</sup>, Inger Njølstad<sup>1</sup>, Tom Wilsgaard<sup>1</sup>.

<sup>1</sup>Department of Community Medicine, UiT The Arctic University of Norway, Tromsø, Norway; <sup>2</sup>Department of Health and Care Sciences, UiT The Arctic University of Norway, Tromsø, Norway; <sup>3</sup>Department of Public Health and General Practice, Norwegian University of Science and Technology, Trondheim, Norway; <sup>4</sup>Clinic for Heart Disease, St. Olavs University Hospital, Trondheim, Norway; <sup>5</sup>Department of Cardiology, University Hospital of North Norway, Tromsø, Norway; <sup>6</sup>Department of Clinical Medicine, UiT The Arctic University of Norway, Tromsø, Norway; <sup>7</sup>Department of Neurology, University Hospital of North Norway, Tromsø, Norway.

Correspondence to Laila Arnesdatter Hopstock, Department of Community Medicine, UiT The Arctic University of Norway, N-9037 Tromsø, Norway. Fax: +47 77 64 48 31.

Telephone: +47 77 64 40 00. E-mail: laila.hopstock@uit.no.

Supplementary material Table 1. Descriptive characteristics by survey for participants aged 40-59 years<sup>a</sup>. The Tromsø Study 1979-2016.

| Age group                                   | Tromsø 2     | Tromsø 3     | Tromsø 4     | Tromsø 5     | Tromsø 6     | Tromsø 7     |
|---------------------------------------------|--------------|--------------|--------------|--------------|--------------|--------------|
|                                             | 1979-80      | 1986-87      | 1994-95      | 2001         | 2007-08      | 2015-16      |
|                                             | n=4685       | n=8030       | n=11045      | n=2434       | n=5938       | n=12404      |
| Male sex                                    | 58.7 (2827)  | 56.2 (4272)  | 53.2 (5481)  | 50.6 (966)   | 48.4 (2785)  | 45.4 (5812)  |
| Total cholesterol, mmol/l                   | 6.56 (1.25)  | 6.31 (1.24)  | 6.23 (1.22)  | 5.99 (1.13)  | 5.57 (1.04)  | 5.35 (1.02)  |
| HDL cholesterol, mmol/l                     | 1.85 (0.50)  | 1.72 (0.41)  | 1.69 (0.41)  | 1.56 (0.38)  | 1.62 (0.41)  | 1.68 (0.46)  |
| Triglycerides, mmol/l                       | 1.21 (0.93)  | 1.22 (0.93)  | 1.33 (1.09)  | 1.35 (1.06)  | 1.31 (1.11)  | 1.30 (1.03)  |
| Systolic blood pressure, mmHg <sup>b</sup>  | 129.6 (16.8) | 127.7 (17.0) | 129.0 (17.2) | 124.1 (17.4) | 123.1 (18.6) | 119.4 (17.5) |
| Diastolic blood pressure, mmHg <sup>b</sup> | 83.7 (10.4)  | 78.7 (10.9)  | 77.6 (11.4)  | 76.5 (11.0)  | 75.4 (10.5)  | 72.6 (10.1)  |
| Body mass index, kg/m <sup>2</sup>          | 24.0 ( 3.3)  | 24.2 (3.4)   | 25.0 (3.8)   | 26.1 (4.3)   | 26.3 (4.3)   | 26.8 (4.7)   |
| Daily smoker. %                             | 49.3 (2233)  | 45.6 (3491)  | 40.1 (4393)  | 34.4 (843)   | 23.2 (1418)  | 15.3 (1830)  |

<sup>a</sup>Values are means (standard deviation) or percent (number). Means and percent are age and sex adjusted using linear mixed models of generalized estimating equations.

<sup>b</sup>Blood pressure was measured manually with Erkameter in Tromsø 2 and measured automatically with Dinamap in Tromsø 3 and later.

Supplementary material Table 2. Population 20<sup>th</sup>, 50<sup>th</sup> and 80<sup>th</sup> percentiles of total cholesterol (mmol/L) in women, by survey and age group. The Tromsø Study 1979-2016.

| Age group                   | Tromsø 2<br>1979-80<br>n=8110 | Tromsø 3<br>1986-87<br>n=10131 | Tromsø 4<br>1994-95<br>n=14142 | Tromsø 5<br>2001-02<br>n=4560 | Tromsø 6<br>2007-08<br>n=6833 | Tromsø 7<br>2015-16<br>n=10989 |
|-----------------------------|-------------------------------|--------------------------------|--------------------------------|-------------------------------|-------------------------------|--------------------------------|
| 20 <sup>th</sup> percentile |                               |                                |                                |                               |                               |                                |
| 20-29 years                 | 4.4                           | 4.2                            | 4.3                            | .                             | .                             |                                |
| 30-39 years                 | 4.8                           | 4.5                            | 4.5                            | 4.3                           | 4.1                           |                                |
| 40-49 years                 | 5.3                           | 5.0                            | 4.9                            | 4.7                           | 4.4                           | 4.3                            |
| 50-59 years                 | .                             | 5.8                            | 5.6                            | 5.5                           | 5.0                           | 4.9                            |
| 60-69 years                 | .                             | .                              | 6.1                            | 5.6                           | 5.1                           | 5.0                            |
| 70-79 years                 | .                             | .                              | 6.1                            | 5.7                           | 5.0                           | 4.7                            |
| 80-89 years                 | .                             | .                              | 5.9                            | 5.7                           | 5.0                           | 4.6                            |
| 50 <sup>th</sup> percentile |                               |                                |                                |                               |                               |                                |
| 20-29 years                 | 5.1                           | 4.8                            | 5.0                            | .                             | .                             | .                              |
| 30-39 years                 | 5.6                           | 5.2                            | 5.2                            | 5.0                           | 4.8                           | .                              |
| 40-49 years                 | 6.2                           | 5.9                            | 5.7                            | 5.5                           | 5.1                           | 5.0                            |
| 50-59 years                 | .                             | 6.8                            | 6.7                            | 6.4                           | 5.8                           | 5.7                            |
| 60-69 years                 | .                             | .                              | 7.1                            | 6.5                           | 6.0                           | 5.9                            |
| 70-79 years                 | .                             | .                              | 7.1                            | 6.7                           | 5.9                           | 5.7                            |
| 80-89 years                 | .                             | .                              | 7.0                            | 6.6                           | 6.0                           | 5.5                            |
| 80 <sup>th</sup> percentile |                               |                                |                                |                               |                               |                                |
| 20-29 years                 | 6.0                           | 5.7                            | 5.8                            | .                             | .                             | .                              |
| 30-39 years                 | 6.6                           | 6.1                            | 6.1                            | 5.8                           | 5.4                           | .                              |
| 40-49 years                 | 7.3                           | 6.9                            | 6.8                            | 6.4                           | 5.9                           | 5.8                            |
| 50-59 years                 | .                             | 7.9                            | 7.7                            | 7.4                           | 6.8                           | 6.5                            |
| 60-69 years                 | .                             | .                              | 8.2                            | 7.5                           | 6.9                           | 6.8                            |
| 70-79 years                 | .                             | .                              | 8.3                            | 7.6                           | 6.9                           | 6.6                            |
| 80-89 years                 | .                             | .                              | 8.1                            | 7.6                           | 7.0                           | 6.6                            |

Supplementary material Table 3. Population 20<sup>th</sup>, 50<sup>th</sup> and 80<sup>th</sup> percentiles of total cholesterol (mmol/L) in men, by survey and age group. The Tromsø Study 1979-2016.

| Age group                   | Tromsø 2<br>1979-80<br>n=8449 | Tromsø 3<br>1986-87<br>n=10373 | Tromsø 4<br>1994-95<br>n=12769 | Tromsø 5<br>2001-02<br>n=3468 | Tromsø 6<br>2007-08<br>n=5994 | Tromsø 7<br>2015-16<br>n=9936 |
|-----------------------------|-------------------------------|--------------------------------|--------------------------------|-------------------------------|-------------------------------|-------------------------------|
| 20 <sup>th</sup> percentile |                               |                                |                                |                               |                               |                               |
| 20-29 years                 | 4.4                           | 4.1                            | 4.3                            | .                             | .                             |                               |
| 30-39 years                 | 5.0                           | 4.8                            | 4.8                            | 4.6                           | 4.3                           |                               |
| 40-49 years                 | 5.5                           | 5.3                            | 5.2                            | 5.2                           | 4.7                           | 4.6                           |
| 50-59 years                 | 5.8                           | 5.6                            | 5.5                            | 5.4                           | 4.9                           | 4.7                           |
| 60-69 years                 | .                             | 5.5                            | 5.5                            | 5.1                           | 4.6                           | 4.4                           |
| 70-79 years                 | .                             | .                              | 5.5                            | 5.0                           | 4.4                           | 4.0                           |
| 80-89 years                 | .                             | .                              | 5.0                            | 5.1                           | 4.1                           | 3.8                           |
| 50 <sup>th</sup> percentile |                               |                                |                                |                               |                               |                               |
| 20-29 years                 | 5.1                           | 4.9                            | 5.1                            | .                             | .                             | .                             |
| 30-39 years                 | 5.9                           | 5.6                            | 5.6                            | 5.3                           | 5.0                           | .                             |
| 40-49 years                 | 6.5                           | 6.2                            | 6.1                            | 5.9                           | 5.5                           | 5.4                           |
| 50-59 years                 | 6.8                           | 6.5                            | 6.4                            | 6.4                           | 5.7                           | 5.5                           |
| 60-69 years                 | .                             | 6.4                            | 6.5                            | 6.0                           | 5.5                           | 5.3                           |
| 70-79 years                 | .                             | .                              | 6.4                            | 5.9                           | 5.2                           | 5.0                           |
| 80-89 years                 | .                             | .                              | 6.1                            | 5.8                           | 5.0                           | 4.7                           |
| 80 <sup>th</sup> percentile |                               |                                |                                |                               |                               |                               |
| 20-29 years                 | 6.1                           | 5.7                            | 5.9                            | .                             | .                             | .                             |
| 30-39 years                 | 6.9                           | 6.6                            | 6.6                            | 6.2                           | 6.0                           | .                             |
| 40-49 years                 | 7.6                           | 7.2                            | 7.1                            | 6.8                           | 6.4                           | 6.2                           |
| 50-59 years                 | 7.8                           | 7.5                            | 7.4                            | 7.4                           | 6.5                           | 6.4                           |
| 60-69 years                 | .                             | 7.4                            | 7.5                            | 7.0                           | 6.4                           | 6.2                           |
| 70-79 years                 | .                             | .                              | 7.5                            | 6.9                           | 6.2                           | 6.0                           |
| 80-89 years                 | .                             | .                              | 7.1                            | 6.6                           | 6.1                           | 5.8                           |

Supplementary material Table 4. Mean population total cholesterol (mmol/L) in those who participated in Tromsø 6 only (first participation 2008) or both Tromsø 4 and 6 (repeated participation both 1994 and 2008), with corresponding number of observations (n), by sex and age group. The Tromsø Study 1994-2008.

| Age group in Tromsø 6 | Tromsø 6 2008 only | Tromsø 4 1994 and Tromsø 6 2008 | Difference Tromsø 6 2008 only vs both Tromsø 4 1994 and Tromsø 6 2008 |
|-----------------------|--------------------|---------------------------------|-----------------------------------------------------------------------|
| Women                 |                    |                                 |                                                                       |
| 40-49 years           | 5.09 (n=622)       | 5.26 (n=1256)                   | 0.17**                                                                |
| 50-59 years           | 5.85 (n=223)       | 5.91 (n=1052)                   | 0.06                                                                  |
| 60-69 years           | 6.01 (n=171)       | 6.00 (n=1910)                   | -0.01                                                                 |
| 70-79 years           | 6.03 (n=69)        | 5.95 (n=904)                    | -0.08                                                                 |
| Men                   |                    |                                 |                                                                       |
| 40-49 years           | 5.50 (n=639)       | 5.63 (n=1007)                   | 0.13*                                                                 |
| 50-59 years           | 5.80 (n=212)       | 5.66 (n=927)                    | -0.14                                                                 |
| 60-69 years           | 5.58 (n=203)       | 5.49 (n=1776)                   | -0.09                                                                 |
| 70-79 years           | 5.41 (n=39)        | 5.28 (n=789)                    | -0.13                                                                 |

\* p=0.02, \*\*p=0.0005

Supplementary material Table 5. Mean population total cholesterol (mmol/L) in those who participated in Tromsø 4 only (lost to follow-up in Tromsø 6) or both Tromsø 4 and 6 (repeated participation both 1994 and 2008), with corresponding number of observations (n), by sex and age group. The Tromsø Study 1994-2008.

| Age group in Tromsø 4 | Tromsø 4 1994 only | Tromsø 4 1994 and Tromsø 6 2008 | Difference Tromsø 6 2008 only vs both Tromsø 4 1994 and Tromsø 6 2008 |
|-----------------------|--------------------|---------------------------------|-----------------------------------------------------------------------|
| Women                 |                    |                                 |                                                                       |
| 20-29 years           | 5.07 (n=1121)      | 5.05 (n=658)                    | -0.02                                                                 |
| 30-39 years           | 5.31 (n=2610)      | 5.35 (n=963)                    | 0.04                                                                  |
| 40-49 years           | 5.81 (n=1903)      | 5.91 (n=1459)                   | 0.10*                                                                 |
| 50-59 years           | 6.83 (n=676)       | 6.66 (n=1522)                   | -0.17*                                                                |
| 60-69 years           | 7.22 (n=862)       | 7.06 (n=753)                    | -0.16                                                                 |
| 70-79 years           | 7.23 (n=1082)      | 7.33 (n=135)                    | 0.10                                                                  |
| Men                   |                    |                                 |                                                                       |
| 20-29 years           | 5.12 (n=1015)      | 5.21 (n=488)                    | 0.09                                                                  |
| 30-39 years           | 5.67 (n=2406)      | 5.75 (n=780)                    | 0.08                                                                  |
| 40-49 years           | 6.13 (n=1944)      | 6.26 (n=1331)                   | 0.13*                                                                 |
| 50-59 years           | 6.57 (n=774)       | 6.41 (n=1432)                   | -0.16*                                                                |
| 60-69 years           | 6.55 (n=884)       | 6.50 (n=592)                    | -0.05                                                                 |
| 70-79 years           | 6.47 (n=841)       | 6.51 (n=80)                     | 0.04                                                                  |

\*0.001 < p < 0.01

Supplementary material Figure 1.

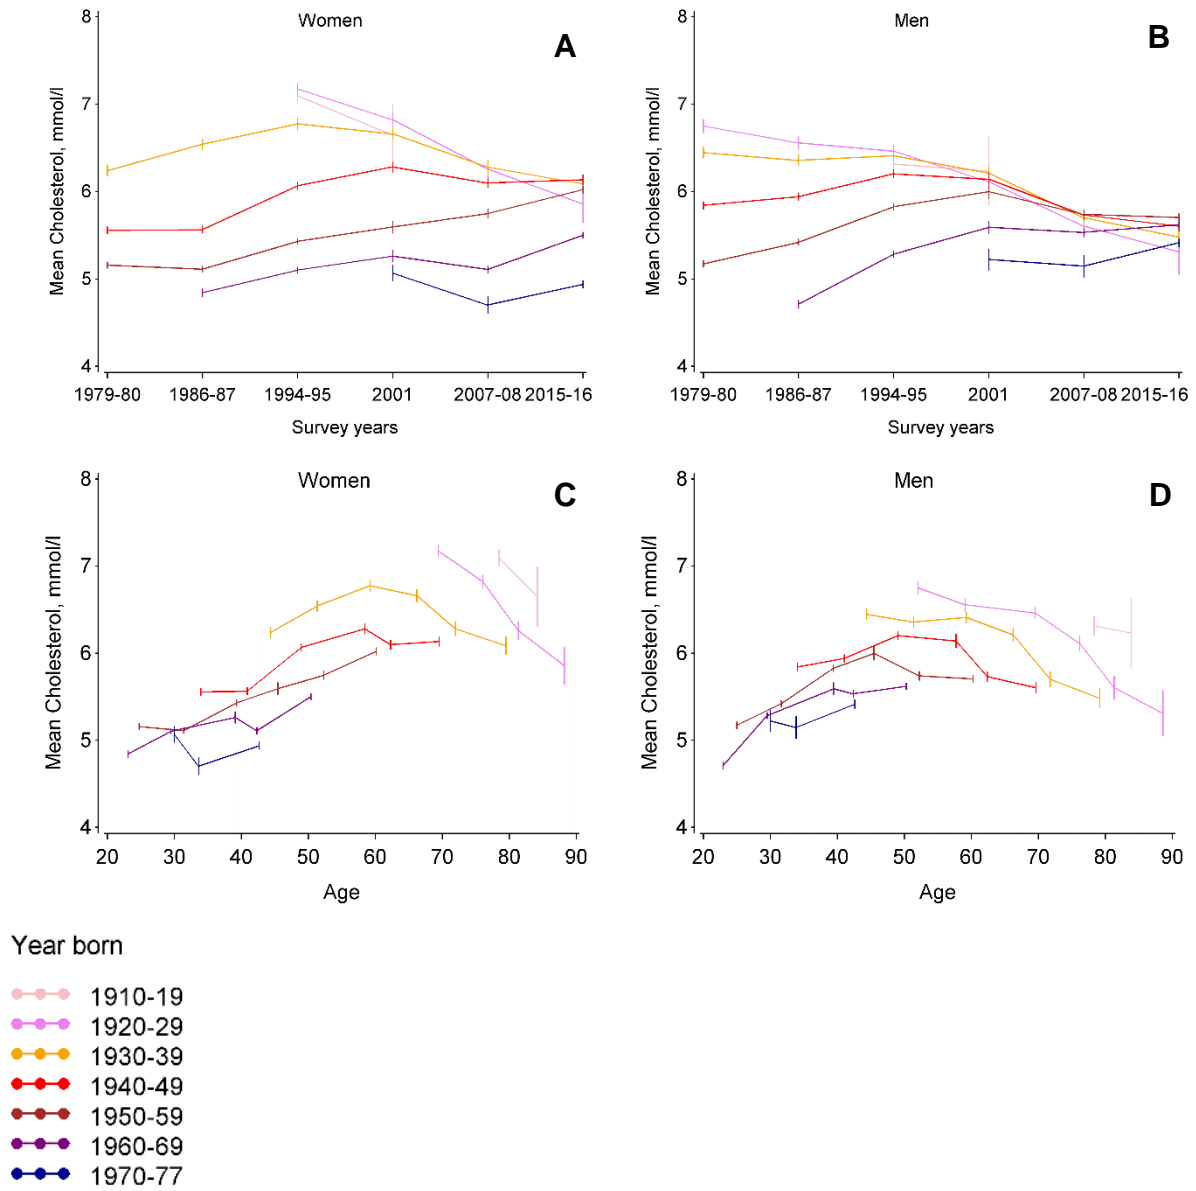

Supplementary material Figure 1. Observed longitudinal cholesterol (mmol/L) trends in female and male never users of lipid-lowering drugs, over surveys (1979-2016) (A and B) or age (20-89 years) (C and D) in 10-year birth cohorts (born 1910-1977) with 95% confidence intervals. The Tromsø Study 1979-2016.

Supplementary material Figure 2.

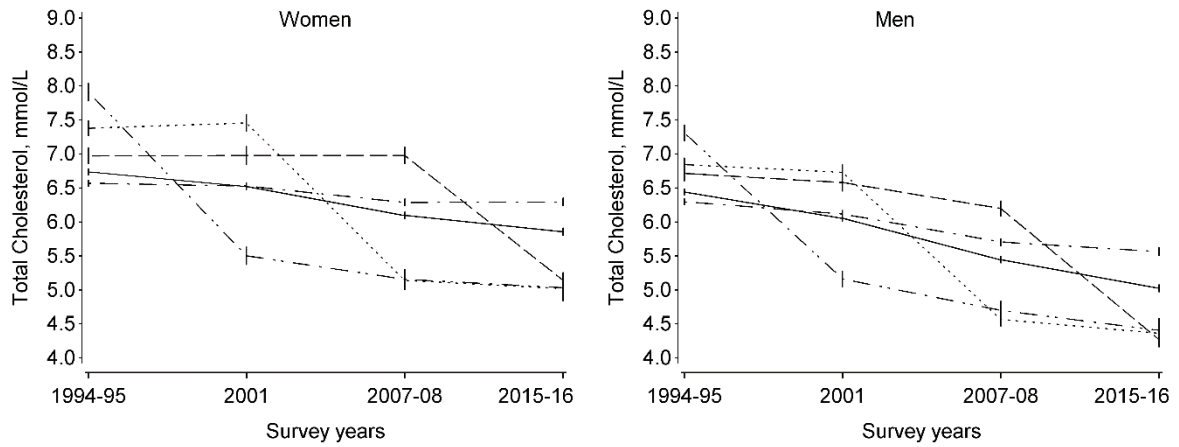

Supplementary material Figure 2. Longitudinal trends in birth-year-adjusted mean total cholesterol (mmol/L) from 1994-2016 in women and men born 1920-49; never users (dash-dot line), current users in 2016 only (dashed line), current users in 2008 and 2016 (dotted line), current users in 2011, 2008 and 2016 (dot-dash-dot dot line) of lipid lowering medication, and all (solid line), with 95% confidence intervals. The Tromsø Study 1994-2016.
